# Supplementary material for: Devising new lipid-coated calcium phosphate/carbonate hybrid nanoparticles for controlled release in endosomes for efficient gene delivery
Source: Royal Society of Chemistry journal article supplement (doi:10.1039/c7tb01635b), 2017-01-01
Supplement: c7tb01635b1.pdf [file c7tb01635b1.pdf]

## ***Electronic Supporting information***

# **Devising New Lipid-coated Calcium Phosphate/Carbonate Hybrid Nanoparticles to Control Release in Endosome for Efficient Gene Delivery**

Yilun Wu,<sup>1</sup> Wenyi Gu,<sup>1</sup> Jie Tang,<sup>1</sup> Zhi Ping Xu<sup>1\*</sup>

*1 Australian Institute for Bioengineering and Nanotechnology, the University of Queensland,  
St Lucia, QLD 4072, Australia.*

*Email: [gordonxu@uq.edu.au](mailto:gordonxu@uq.edu.au); Fax: 61-7-33463937; Tel: 61-7-33463809*

**Table S1** Information of oligonucleotides

| Name                         | Supplier | Sequence                        |
|------------------------------|----------|---------------------------------|
| dsDNA-cy5 (sense)            | IDTDNA   | TTCTCCGAACGTGTCACGTTT-cyanine 5 |
| dsDNA-cy5 (antisense)        | IDTDNA   | AAACGTGACACGTTTCGGAGAA          |
| PD-L1 (sense)                | Sigma    | AGACGUAAGCAGUGUUGAA             |
| PD-L1 (antisense)            | Sigma    | UUCAACACUGCUUACGUCU             |
| Negative control (sense)     | Sigma    | CUUACGCUGAGUACUUCGA             |
| Negative control (antisense) | Sigma    | UCGAAGUACUCAGCGUAAG             |
| PD-L1 primer (Forward)       | Sigma    | CCCTCTGATCGTCGATTGGC            |
| PD-L1 primer (Forward)       | Sigma    | GCTTAGCAGTGTCTCCCTGG            |
| Plk1 (sense)                 | IDTDNA   | CCAUUAACGAGCUGCUUAA             |
| Plk1 (antisense)             | IDTDNA   | CCAUUAACGAGCUGCUUAA             |
| Scramble-Plk1 (sense)        | IDTDNA   | UUCUCCGAACGUGUCACGU             |
| Scramble-Plk1 (antisense)    | IDTDNA   | ACGUGACACGUUCGGAGAA             |

**Table S2.** The component element analysis of LCCP cores with different P/C ratios.

| <b>Molar ratio (P:C)</b> | <b>Ca (mmol/g)</b> | <b>P (mmol/g)</b> | <b>C (mmol/g)</b> | <b>C/P molar ratios (calculated/theoretical)</b> | <b>Possible formula*</b>                                                                      |
|--------------------------|--------------------|-------------------|-------------------|--------------------------------------------------|-----------------------------------------------------------------------------------------------|
| 4:0                      | 9.38               | 6.84              | 0.69              | 0.26/0.00                                        | Ca[(HPO <sub>4</sub> ) <sub>0.8</sub> (CO <sub>3</sub> ) <sub>0.1</sub> (OH) <sub>0.2</sub> ] |
| 3:1                      | 9.55               | 5.80              | 1.73              | 0.46/0.33                                        | Ca[(HPO <sub>4</sub> ) <sub>0.7</sub> (CO <sub>3</sub> ) <sub>0.2</sub> (OH) <sub>0.2</sub> ] |
| 2:2                      | 9.46               | 3.72              | 4.16              | 1.26/1.00                                        | Ca[(HPO <sub>4</sub> ) <sub>0.4</sub> (CO <sub>3</sub> ) <sub>0.5</sub> (OH) <sub>0.2</sub> ] |
| 1:3                      | 9.44               | 2.09              | 7.15              | 3.44/3.00                                        | Ca[(HPO <sub>4</sub> ) <sub>0.2</sub> (CO <sub>3</sub> ) <sub>0.7</sub> (OH) <sub>0.2</sub> ] |

\* Assuming the existence patterns of phosphorous and carbo are HPO<sub>4</sub><sup>2-</sup> and CO<sub>3</sub><sup>2-</sup>, respectively.

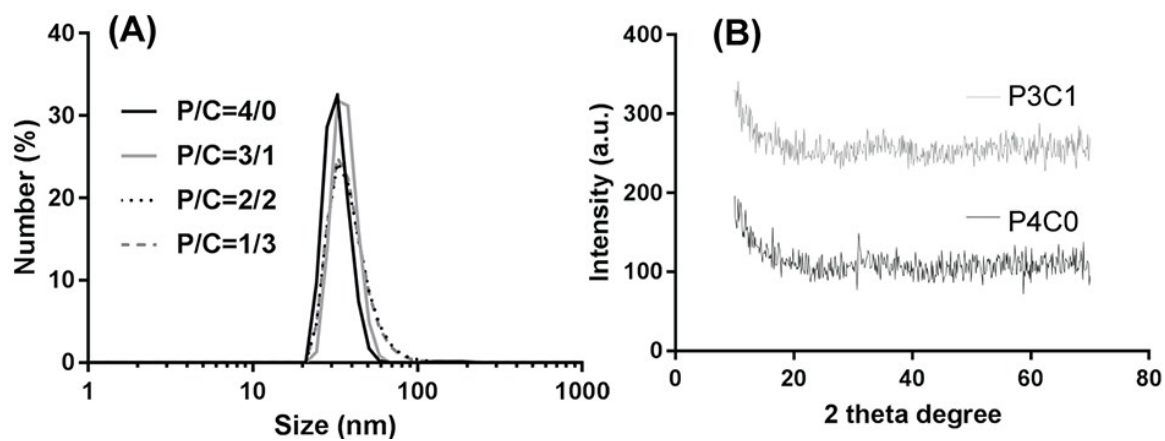

**Figure S1.** (A) The hydrodynamic diameter of LCCP NPs, represented by Number (%); and (B) XRD pattern of P4C0 and P3C1 cores.

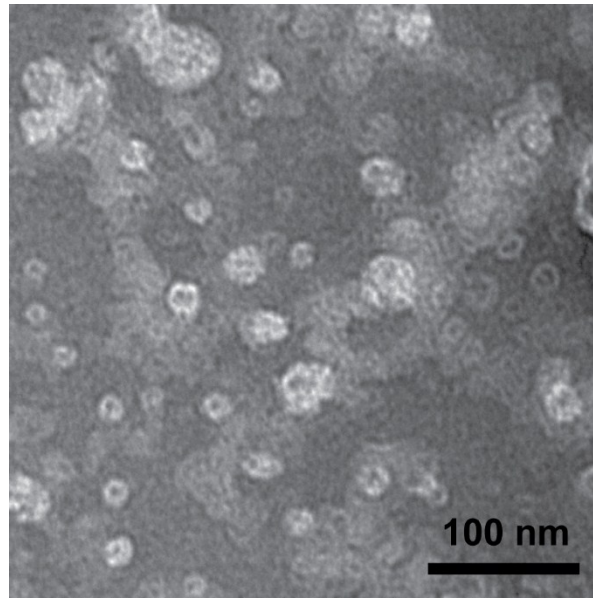

**Figure S2.** TEM image of P3C1 NPs negative staining with 1% uranyl acetate.

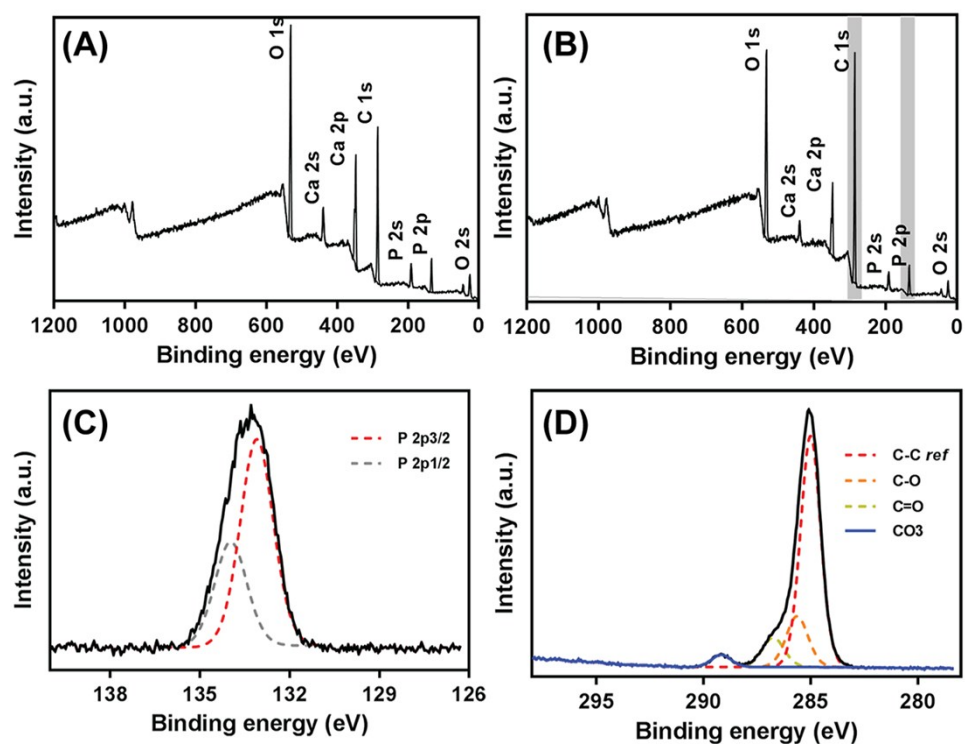

**Figure S3.** XPS survey scan of (A) P4C0 and (B) P3C1 cores coated with DOPA. The details of P3C1 were shown in high resolution scan of (C) P2p and (D) C1s.

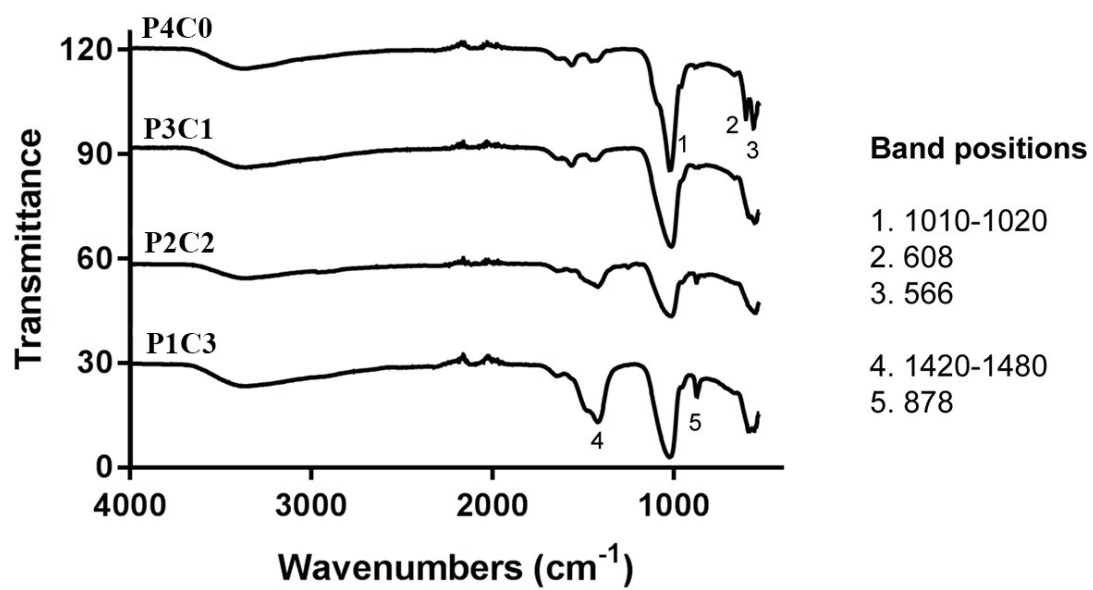

Figure S4. FTIR spectrum for the LCCP cores.

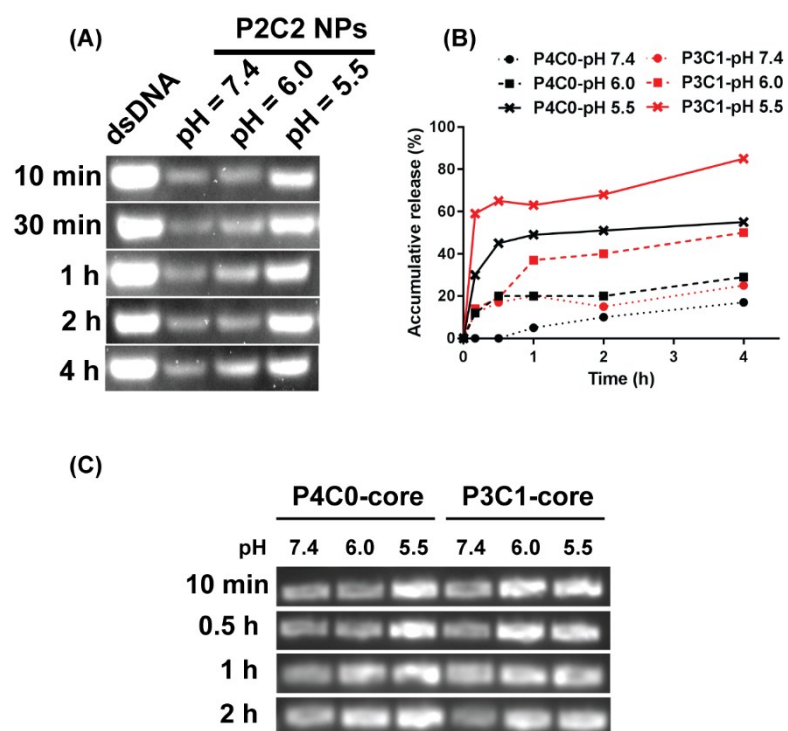

**Figure S5.** (A) P2C2 release profile; (B) DNA band intensity in Figure 4 normalized by the first lane dsDNA in corresponding line; (C) The release trend of P4C0 and P3C1 cores under different pH values.

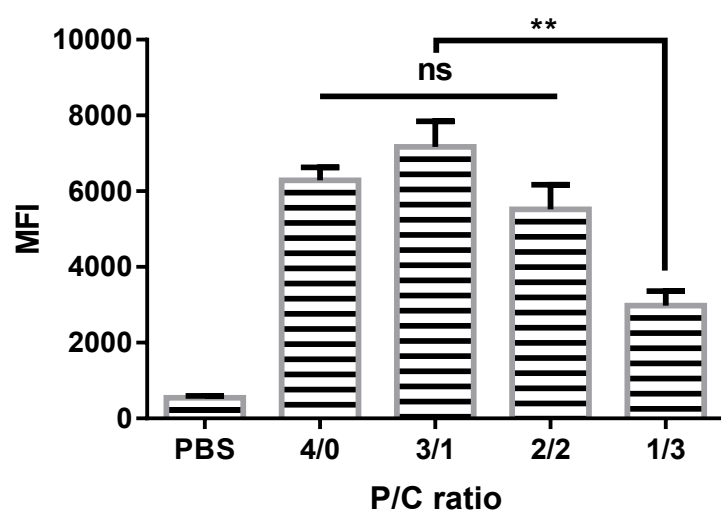

**Figure S6.** The effect of P/C ratios on the taken up of particles with 25 nM dsDNA-cy5, represented by MFI.

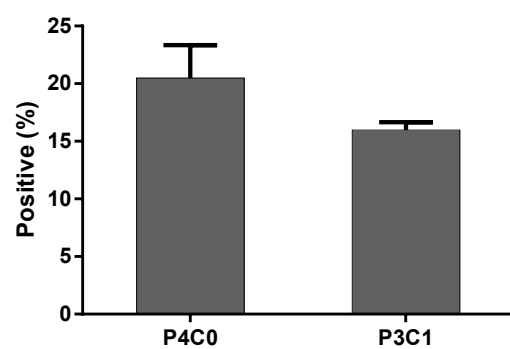

**Figure S7.** The positive cell percentage of B10F10 treated with P4C0 or P3C1 with dsDNA-cy5 at 25 nM cy5 concentration. Cells were cultured in DMEM containing 10% FBS for 4 h with P4C0 or P3C1 NPs.

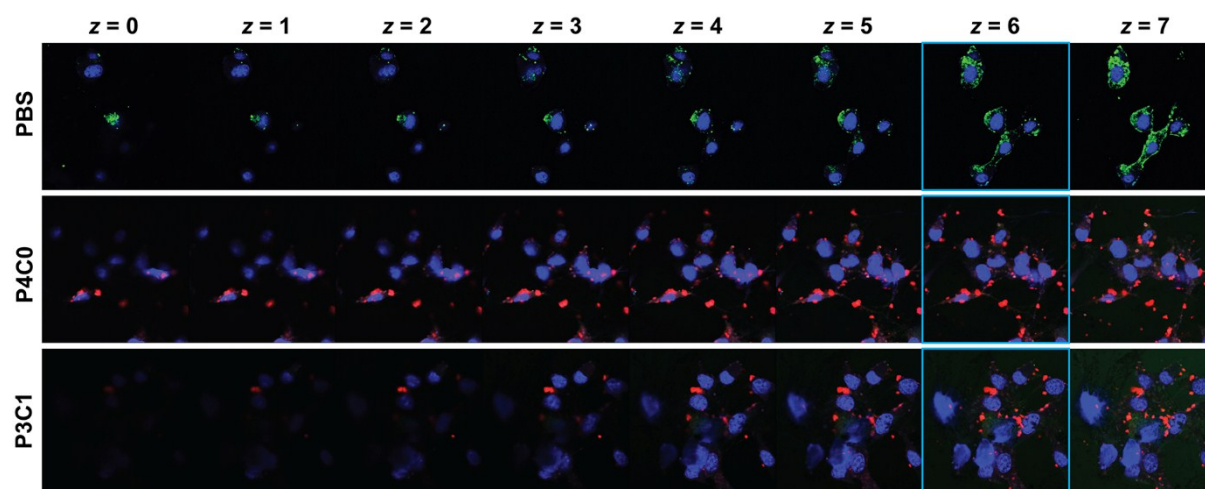

**Figure S8.** CLSM images of the same region of cells at different  $z$  stacks. The  $z = 6$  and  $7$  planes were focused on the central of most cells in the selected area. The individual channels and three-view diagrams based on the images at  $z = 6$  position of each series (blue framed) was chosen as examples and shown in Figure 7.

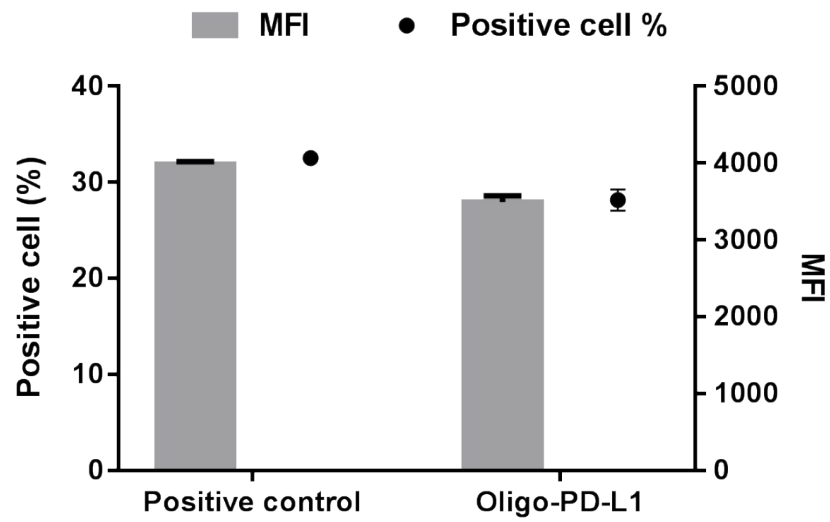

**Figure S9.** The down regulation of PD-L1 expression for B16F10 cells treated with Oligo-PDL1 (40 nM)
